# Supplementary material for: Comparative clinical utility of tumor genomic testing and cell-free DNA in metastatic breast cancer
Source: Springer Nature journal article supplement (doi:10.1007/s10549-017-4257-x), 2017-05-12
Supplement: MOESM2 [file 12285060]

## Sheet: SupTable5
Supplementary Table 5: Mutations and amplifications identified in the genes on the clinical assays used in 963 TCGA breast tumors
						Genes on GHv1 and GHv2 (except CSF1R)
			Genes on CPD-PPP and CPD-Full
TCGA ID (n=963)	WES Mutational Load (/Mb)	Panel specific High Mutation Load (either)	Total metDNA	CSF1R	CSFR Amp	AKT1	ALK	ALK AMP	BRAF	BRAF AMP	EGFR	EGFR AMP	ERBB2	HRAS	IDH1	KIT	KIT AMP	KRAS	MET	NOTCH1	NRAS	PDGFRA	PIK3CA	PTEN	RET	TP53	APC	ATM	CDH1	CTNNB1	FBXW7	FGFR1	FGFR2	FGFR3	GNA11	GNAQ	GNAS	HNF1A	JAK2	JAK3	MLH1	MPL	NPM1	PTPN11	SMAD4	SMO	SRC	STK11	VHL
TCGA-A1-A0SB		No	0
TCGA-A1-A0SD	1.08	No	0
TCGA-A1-A0SE	0.48	No	0
TCGA-A1-A0SF	0.4	No	0																										M
TCGA-A1-A0SG	0.56	No	0
TCGA-A1-A0SH	0.38	No	0
TCGA-A1-A0SI	1.44	No	0
TCGA-A1-A0SJ	2.62	No	2																				M			M
TCGA-A1-A0SK	0.52	No	0
TCGA-A1-A0SM	0.9	No	1																							M						A
TCGA-A1-A0SN	0.24	No	0
TCGA-A1-A0SP	0.72	No	0
TCGA-A1-A0SQ	0.5	No	1																							M					M
TCGA-A2-A04N	0.4	No	0
TCGA-A2-A04P	0.76	No	1																				M
TCGA-A2-A04Q	2.02	Yes	4							A							A						M			M
TCGA-A2-A04R	0.28	No	0
TCGA-A2-A04T		No	0
TCGA-A2-A04U	1.38	Yes	3														A						M			M
TCGA-A2-A04V	0.78	No	1																							M
TCGA-A2-A04W	0.44	No	1																				M									A
TCGA-A2-A04X	1.56	No	2																				M			M
TCGA-A2-A04Y	0.42	No	0
TCGA-A2-A0CK	0.52	No	0
TCGA-A2-A0CL	0.18	No	0																										M
TCGA-A2-A0CM	0.24	No	0
TCGA-A2-A0CO	0.7	No	1																							M
TCGA-A2-A0CP	0.28	No	0																										M
TCGA-A2-A0CQ	0.54	No	1																				M									A
TCGA-A2-A0CR	0.52	No	0
TCGA-A2-A0CS	1.5	No	1																				M						M
TCGA-A2-A0CT	1.06	No	2																				M	M
TCGA-A2-A0CU	1.08	No	0
TCGA-A2-A0CV	0.44	No	0																													A
TCGA-A2-A0CW	0.4	No	0
TCGA-A2-A0CX	0.86	Yes	3									A											M			M
TCGA-A2-A0D0	2.96	No	0
TCGA-A2-A0D1	1.24	Yes	2									A														M					M
TCGA-A2-A0D2	0.56	Yes	3									A											M			M
TCGA-A2-A0D3	1.22	No	2							A									A
TCGA-A2-A0D4	0.28	No	1																				M
TCGA-A2-A0EM	0.38	No	0
TCGA-A2-A0EN	0.42	No	1																				M
TCGA-A2-A0EO	0.44	No	1																				M
TCGA-A2-A0EP	0.46	No	1																				M
TCGA-A2-A0EQ	0.02	No	0
TCGA-A2-A0ER	1.44	Yes	3									A											M			M
TCGA-A2-A0ES	0.38	No	0
TCGA-A2-A0ET	0.06	No	1		A																											A
TCGA-A2-A0EU	0.5	No	0
TCGA-A2-A0EV	0.74	No	0
TCGA-A2-A0EW	0.94	No	1																				M
TCGA-A2-A0EX	0.34	No	1																				M									A
TCGA-A2-A0EY	0.26	Yes	1																				M						M			A
TCGA-A2-A0ST		No	2																				M			M
TCGA-A2-A0SU	2.64	No	0
TCGA-A2-A0SV	0.3	No	0
TCGA-A2-A0SW	0.48	No	2																					M		M						A
TCGA-A2-A0SX	0.92	No	1																							M
TCGA-A2-A0SY	0.38	No	1																							M
TCGA-A2-A0T0	1.88	No	1																				M						M
TCGA-A2-A0T1	2.5	No	2				M															M
TCGA-A2-A0T2		No	1																							M
TCGA-A2-A0T3	0.18	No	1																							M
TCGA-A2-A0T4	0.44	No	0																													A
TCGA-A2-A0T5	0.48	No	2	M																			M						M
TCGA-A2-A0T6	0.28	No	1																						M
TCGA-A2-A0T7	0.32	No	1										M																M
TCGA-A2-A0YC	0.26	No	1																				M
TCGA-A2-A0YD	0.32	No	1																				M
TCGA-A2-A0YE	0.76	No	0																										M
TCGA-A2-A0YF	0.54	Yes	3									A					A									M
TCGA-A2-A0YG	0.28	No	0
TCGA-A2-A0YH	0.76	No	1																							M
TCGA-A2-A0YI	1.02	Yes	3							A													M			M						A
TCGA-A2-A0YJ	0.18	No	1																				M
TCGA-A2-A0YK	1.06	No	1																							M
TCGA-A2-A0YL	3.3	Yes	1																				M					M	M			A
TCGA-A2-A0YM	0.18	No	1																				M
TCGA-A2-A0YT	1.2	No	1																							M						A
TCGA-A2-A1FV	0.8	No	2																				M			M
TCGA-A2-A1FW	0.52	No	0																										M			A
TCGA-A2-A1FX	1.4	No	1							A																														M
TCGA-A2-A1FZ	0.36	No	0
TCGA-A2-A1G0	0.3	No	1																				M
TCGA-A2-A1G1	0.58	No	1																				M						M
TCGA-A2-A1G4	0.34	No	1																							M
TCGA-A2-A1G6	0.88	No	1																						M
TCGA-A2-A259		No	0
TCGA-A2-A25A		No	0
TCGA-A2-A25B	0.1	No	1																				M						M
TCGA-A2-A25C	1.14	No	0																																										M
TCGA-A2-A25D	0.64	No	1																				M
TCGA-A2-A25E	0.68	No	1																				M
TCGA-A2-A25F	0.9	No	0
TCGA-A2-A3KC	0.16	No	0
TCGA-A2-A3KD	0.24	No	1																				M						M
TCGA-A2-A3XS	0.1	No	0
TCGA-A2-A3XT	0.28	No	1																							M
TCGA-A2-A3XU	1.2	No	2																	M						M					M
TCGA-A2-A3XV	0.26	No	0
TCGA-A2-A3XW		No	2										M													M
TCGA-A2-A3XX	0.66	No	0
TCGA-A2-A3XY	0.52	No	1																							M
TCGA-A2-A3XZ	0.58	No	1																							M
TCGA-A2-A3Y0	0.52	No	0
TCGA-A2-A4RW	2.4	No	1																							M
TCGA-A2-A4RX	1.56	No	0
TCGA-A2-A4RY	0.18	No	0
TCGA-A2-A4S0	0.04	No	1																				M									A
TCGA-A2-A4S1	0.12	No	0
TCGA-A2-A4S2		No	1																							M
TCGA-A2-A4S3	1.08	No	1																				M						M
TCGA-A7-A0CD	0.9	No	2								M															M						A
TCGA-A7-A0CE		No	0
TCGA-A7-A0CG	0.32	No	1																							M												M
TCGA-A7-A0CH		No	1																				M
TCGA-A7-A0CJ		No	1																				M
TCGA-A7-A0D9	0.24	No	2																				M			M
TCGA-A7-A0DA	0.38	No	2																				M		M
TCGA-A7-A0DB		No	1																							M
TCGA-A7-A0DC		No	1																				M
TCGA-A7-A13D	2.46	No	0
TCGA-A7-A13E	3.08	No	1																							M
TCGA-A7-A13F		No	1																							M				M
TCGA-A7-A13G	1.48	No	0
TCGA-A7-A13H	0.34	No	1									A
TCGA-A7-A26E	0.28	No	0																										M
TCGA-A7-A26F	0.7	No	1																				M																	M
TCGA-A7-A26G	0.5	No	2																					M		M
TCGA-A7-A26H	0.82	No	2																					M		M
TCGA-A7-A26I	1.34	No	1																				M							M								M
TCGA-A7-A26J	0.62	No	1																							M
TCGA-A7-A2KD	0.38	No	0
TCGA-A7-A3IY	0.48	No	1																							M
TCGA-A7-A3IZ	0.22	No	0
TCGA-A7-A3J0	0.84	No	0																								M		M
TCGA-A7-A3J1	0.4	No	0
TCGA-A7-A3RF	0.28	No	1																				M						M
TCGA-A7-A425	0.28	No	1																							M
TCGA-A7-A426	0.38	No	1																				M
TCGA-A7-A4SA	0.26	No	0																										M
TCGA-A7-A4SB		No	2				M																			M
TCGA-A7-A4SD	0.9	No	1																				M						M
TCGA-A7-A4SE	0.6	No	1																							M
TCGA-A7-A4SF	1.36	No	2																						M	M
TCGA-A7-A56D	1.02	No	1																				M
TCGA-A7-A5ZV		No	1																							M
TCGA-A7-A5ZW	1.56	No	1																							M								M
TCGA-A7-A5ZX	0.34	No	1																				M
TCGA-A8-A06N		No	0																										M
TCGA-A8-A06O	0.34	No	0
TCGA-A8-A06P	0.84	No	1																							M
TCGA-A8-A06Q	0.4	No	1																				M
TCGA-A8-A06R	2.92	Yes	2																				M			M						A
TCGA-A8-A06T	1.1	Yes	2																A				M									A
TCGA-A8-A06U	0.42	No	0																													A
TCGA-A8-A06X	0.86	No	2																				M			M
TCGA-A8-A06Y	2.72	No	0																									M
TCGA-A8-A06Z	0.42	No	0
TCGA-A8-A075	0.9	No	2										M													M
TCGA-A8-A076	1.08	No	2																				M			M
TCGA-A8-A079	0.86	No	0
TCGA-A8-A07B	0.74	No	1																							M
TCGA-A8-A07E		No	1																				M						M
TCGA-A8-A07F	0.82	No	0																									M
TCGA-A8-A07G	0.36	No	0
TCGA-A8-A07I	0.52	No	2													M							M
TCGA-A8-A07J	0.7	No	0
TCGA-A8-A07L	0.32	No	0
TCGA-A8-A07O	1.44	No	0																													A
TCGA-A8-A07P		No	1																							M		M				A
TCGA-A8-A07R		No	0																									M
TCGA-A8-A07U	0.66	Yes	2														A									M						A							M
TCGA-A8-A07W	0.44	No	1																							M
TCGA-A8-A07Z	1.44	No	1																							M
TCGA-A8-A081	0.2	No	1																				M
TCGA-A8-A082		No	2																				M			M						A
TCGA-A8-A083		No	0
TCGA-A8-A084		No	0
TCGA-A8-A085	1.36	No	1																				M										M
TCGA-A8-A086		No	0
TCGA-A8-A08A		No	0
TCGA-A8-A08B	0.88	No	0
TCGA-A8-A08C	0.36	No	2														A						M
TCGA-A8-A08F	0.36	No	0																																		M
TCGA-A8-A08G	1.74	No	1														A															A
TCGA-A8-A08H	0.54	No	0																													A
TCGA-A8-A08I		No	0
TCGA-A8-A08J	1.04	No	1																							M
TCGA-A8-A08L	0.46	No	0
TCGA-A8-A08O	2.94	No	1																				M																M
TCGA-A8-A08P		No	1																				M									A
TCGA-A8-A08R	0.34	No	1																				M
TCGA-A8-A08S	2.38	No	2																				M			M
TCGA-A8-A08T	0.66	No	0
TCGA-A8-A08X	0.62	No	1																				M
TCGA-A8-A08Z	0.36	No	1																							M
TCGA-A8-A090	0.42	No	2										M										M
TCGA-A8-A091	0.34	No	0
TCGA-A8-A092	0.24	No	0																										M
TCGA-A8-A093	1.06	No	2																				M			M
TCGA-A8-A094	1.3	No	1																				M
TCGA-A8-A095	2.66	No	1																							M																			M
TCGA-A8-A096	1.98	No	2													M							M
TCGA-A8-A097	0.8	No	1																				M
TCGA-A8-A099	1.26	No	1																							M						A
TCGA-A8-A09A	0.52	No	0
TCGA-A8-A09B		No	1													M																A							M
TCGA-A8-A09C	1.58	No	0
TCGA-A8-A09D	0.34	No	1																				M
TCGA-A8-A09E	0.44	No	1																				M
TCGA-A8-A09G	0.56	No	1																					M
TCGA-A8-A09I	3.48	No	0
TCGA-A8-A09K	1.98	No	0
TCGA-A8-A09M	0.54	No	0
TCGA-A8-A09N		No	0																												M
TCGA-A8-A09Q	1.48	No	0
TCGA-A8-A09R		No	0
TCGA-A8-A09T	1.68	No	0																													A
TCGA-A8-A09V	0.32	No	0																										M								M
TCGA-A8-A09W	0.38	No	0																										M
TCGA-A8-A09X	1.02	No	0																										M
TCGA-A8-A09Z	0.74	No	1																							M			M				M
TCGA-A8-A0A1	16.18	Yes	0																										M						M		M				M				M
TCGA-A8-A0A2	0.54	No	1																				M
TCGA-A8-A0A4	0.4	No	0
TCGA-A8-A0A6	0.2	No	1	M																									M
TCGA-A8-A0A7	0.44	Yes	2										M										M				M	M	M		M															M
TCGA-A8-A0A9	1.46	No	1																				M						M
TCGA-A8-A0AB	0.7	No	1																				M						M
TCGA-A8-A0AD	0.36	No	1										M																M
TCGA-AC-A23C	0.36	No	0
TCGA-AC-A23E	1.6	Yes	3																				M	M		M
TCGA-AC-A23G	0.24	No	1																				M
TCGA-AC-A23H	0.24	No	1	M																									M
TCGA-AC-A2B8	70.3	Yes	5						M		M				M							M	M				M								M					M					M
TCGA-AC-A2BK	1.3	No	1																				M
TCGA-AC-A2BM	1.08	No	0
TCGA-AC-A2FB	0.24	No	0																													A
TCGA-AC-A2FE		No	0
TCGA-AC-A2FF	0.06	No	0
TCGA-AC-A2FG	0.14	No	1																					M					M
TCGA-AC-A2FK	0.48	No	0																										M
TCGA-AC-A2FM	0.04	No	0
TCGA-AC-A2FO	0.38	No	0
TCGA-AC-A2QH	0.26	No	1																				M						M
TCGA-AC-A2QI	0.44	Yes	3									A							A							M
TCGA-AC-A2QJ	1.1	No	1																				M								M
TCGA-AC-A3BB	0.22	No	0
TCGA-AC-A3EH	0.6	No	0																										M
TCGA-AC-A3HN	0.58	No	0
TCGA-AC-A3OD	0.26	No	0
TCGA-AC-A3QP	0.22	Yes	2																				M			M			M
TCGA-AC-A3TM	0.48	No	0																													A
TCGA-AC-A3TN	0.6	No	1																				M						M
TCGA-AC-A3W5	0.54	No	1																				M						M
TCGA-AC-A3W6	1.74	No	0
TCGA-AC-A3W7	2.12	Yes	2																	M			M					M	M
TCGA-AC-A3YI	0.74	No	1																				M						M
TCGA-AC-A3YJ	0.14	No	1										M																M			A
TCGA-AC-A5EH	0.32	No	2																				M	M
TCGA-AC-A5EI		No	2																				M			M
TCGA-AC-A5XS	1.76	No	0
TCGA-AC-A5XU	6.26	No	1																				M						M
TCGA-AC-A62X	0.72	No	1																							M
TCGA-AC-A62Y	0.96	No	1																							M
TCGA-AN-A03X	0.92	No	1																					M
TCGA-AN-A03Y	0.42	No	1																				M
TCGA-AN-A041	0.34	No	1																				M						M
TCGA-AN-A046	0.34	No	0
TCGA-AN-A049	80.08	Yes	6										M			M		M					M	M		M	M	M			M		M		M		M			M	M
TCGA-AN-A04A	0.4	No	1																				M
TCGA-AN-A04C	0.52	No	1													M
TCGA-AN-A04D	0.92	No	1																				M
TCGA-AN-A0AJ	1.22	No	0
TCGA-AN-A0AK	1.08	No	2																				M			M
TCGA-AN-A0AL	12.7	Yes	2				M																M															M		M	M
TCGA-AN-A0AM	1	No	1																							M
TCGA-AN-A0AR	0.8	No	0
TCGA-AN-A0AS	1.56	No	1																							M
TCGA-AN-A0AT	0.6	No	1																							M
TCGA-AN-A0FD		No	0																																	M
TCGA-AN-A0FF	1.96	No	0																													A
TCGA-AN-A0FJ	0.26	No	1																				M														M
TCGA-AN-A0FK	1.3	No	1																							M
TCGA-AN-A0FL	0.52	No	0
TCGA-AN-A0FN	2.36	No	1																							M							M	M
TCGA-AN-A0FS	0.28	No	1						M
TCGA-AN-A0FT	0.52	No	1																				M
TCGA-AN-A0FV	1.02	No	1																							M
TCGA-AN-A0FW	1.22	No	1																							M
TCGA-AN-A0FX	1.48	No	0
TCGA-AN-A0FY	1.48	No	1																							M						A
TCGA-AN-A0FZ	0.88	No	1																							M
TCGA-AN-A0XL		No	0
TCGA-AN-A0XN	0.8	No	1																				M
TCGA-AN-A0XO	1.9	No	1																							M						A
TCGA-AN-A0XP	0.5	No	1																				M									A
TCGA-AN-A0XR	0.38	No	1																				M
TCGA-AN-A0XS	0.7	No	1			M
TCGA-AN-A0XT	0.44	No	1																				M
TCGA-AN-A0XU	0.24	No	1																							M
TCGA-AN-A0XV	1.48	No	0
TCGA-AN-A0XW	0.4	No	0																													A
TCGA-AO-A03L	2.98	No	1																					M
TCGA-AO-A03M		No	2																				M			M
TCGA-AO-A03N		Yes	1																				M																			M
TCGA-AO-A03O	0.34	No	2																				M			M
TCGA-AO-A03P	0.96	No	1																							M
TCGA-AO-A03R	0.52	No	0
TCGA-AO-A03T	0.12	No	1																							M						A
TCGA-AO-A03U		No	0
TCGA-AO-A03V	1.24	No	0
TCGA-AO-A0J2	0.88	No	1																							M
TCGA-AO-A0J3	0.88	No	2							A																M						A
TCGA-AO-A0J4	1.1	No	0																													A
TCGA-AO-A0J5	1.28	No	1														A
TCGA-AO-A0J6	0.68	No	1																				M
TCGA-AO-A0J7	1.54	No	1																							M						A
TCGA-AO-A0J8	0.24	No	1																				M
TCGA-AO-A0J9	0.3	No	0																										M
TCGA-AO-A0JA	0.1	No	0																										M
TCGA-AO-A0JB	0.3	No	2																				M	M
TCGA-AO-A0JC	1.12	No	1																							M
TCGA-AO-A0JD	0.12	No	0
TCGA-AO-A0JE	1.28	No	1																							M
TCGA-AO-A0JF	0.62	No	0
TCGA-AO-A0JI	0.26	No	1																				M											M
TCGA-AO-A0JJ	0.22	No	0
TCGA-AO-A0JL		No	0
TCGA-AO-A0JM	0.16	No	1																							M
TCGA-AO-A124	0.56	No	0																									M
TCGA-AO-A125		No	1																							M
TCGA-AO-A126		No	1																				M																M
TCGA-AO-A128	2.26	No	1																				M
TCGA-AO-A129		Yes	4										M			M					M					M			M
TCGA-AO-A12A	11.96	No	1																							M		M
TCGA-AO-A12B		No	1																				M
TCGA-AO-A12D	0.24	No	0
TCGA-AO-A12E		No	2																			M				M
TCGA-AO-A12F	0.62	No	0
TCGA-AO-A12G		No	0
TCGA-AO-A12H	0.5	No	2								M													M
TCGA-AO-A1KO		No	0
TCGA-AO-A1KP	0.34	No	0
TCGA-AO-A1KR	0.72	No	0																													A
TCGA-AO-A1KS	0.96	No	1																				M
TCGA-AO-A1KT	0.56	No	0
TCGA-AQ-A04H	0.8	No	0																													A					M
TCGA-AQ-A04J	1.86	No	1																							M
TCGA-AQ-A04L		No	1																							M
TCGA-AQ-A0Y5	0.76	No	1																							M
TCGA-AQ-A1H2	0.8	No	1																				M
TCGA-AQ-A1H3	0.54	No	1																				M
TCGA-AQ-A54N	0.14	No	0
TCGA-AQ-A54O	0.9	No	2					A																		M						A
TCGA-AR-A0TS	0.88	No	1																				M
TCGA-AR-A0TX	1	No	1																							M
TCGA-AR-A0TY	0.58	No	1																							M
TCGA-AR-A0U0	0.84	No	0
TCGA-AR-A0U1		No	1																							M
TCGA-AR-A0U2	0.5	Yes	4					A		A									A							M
TCGA-AR-A0U3	0.86	No	1																							M
TCGA-AR-A1AH	0.5	No	2									A														M						A
TCGA-AR-A1AI	1.26	No	1																							M
TCGA-AR-A1AJ	1.02	No	1																							M
TCGA-AR-A1AK	0.38	No	2																					M		M						A
TCGA-AR-A1AL	0.98	No	0																																					M
TCGA-AR-A1AM	0.38	No	2															M					M						M
TCGA-AR-A1AN	0.22	No	1																					M
TCGA-AR-A1AO	0.36	No	1																							M
TCGA-AR-A1AP	0.28	No	0
TCGA-AR-A1AQ	1.06	No	1																							M
TCGA-AR-A1AR	0.52	No	1																							M
TCGA-AR-A1AS	0.72	No	1																							M						A
TCGA-AR-A1AU	0.46	Yes	3															M					M			M
TCGA-AR-A1AV	0.2	No	0
TCGA-AR-A1AW	0.02	No	2																			M	M
TCGA-AR-A1AX		No	2																				M			M											M
TCGA-AR-A1AY		No	0																								M
TCGA-AR-A24H		No	1																							M
TCGA-AR-A24K	0.32	No	0
TCGA-AR-A24L	0.06	No	2																				M			M
TCGA-AR-A24M		No	0
TCGA-AR-A24N		No	1																				M
TCGA-AR-A24O		No	0
TCGA-AR-A24P	0.56	No	1																				M
TCGA-AR-A24Q	0.4	No	1																							M
TCGA-AR-A24R	2.12	Yes	3							A									A					M
TCGA-AR-A24S	0.1	No	0
TCGA-AR-A24T	0.58	No	2																				M			M
TCGA-AR-A24U	0.26	Yes	2																				M			M			M
TCGA-AR-A24V	0.34	No	0
TCGA-AR-A24W		No	0
TCGA-AR-A24X	0.34	No	1									A
TCGA-AR-A24Z	0.42	No	0																										M
TCGA-AR-A250	0.68	No	0
TCGA-AR-A251	1.02	No	0																													A
TCGA-AR-A252	2.56	No	1																							M						A
TCGA-AR-A254	0.14	No	0
TCGA-AR-A255	0.32	No	2																	M						M
TCGA-AR-A256	0.9	No	1																				M					M
TCGA-AR-A2LE	2.66	No	1																							M					M	A
TCGA-AR-A2LH	4.32	No	0																										M
TCGA-AR-A2LJ	0.3	No	0
TCGA-AR-A2LK	0.1	No	1																				M						M
TCGA-AR-A2LL	0.62	No	1																				M
TCGA-AR-A2LM	0.54	No	1																					M					M
TCGA-AR-A2LN	0.22	No	1																				M
TCGA-AR-A2LO	0.52	No	0																										M
TCGA-AR-A2LQ	0.18	No	0
TCGA-AR-A2LR	0.08	No	0
TCGA-AR-A5QM	0.72	Yes	3								M									M						M
TCGA-AR-A5QN	0.36	No	1																				M						M
TCGA-AR-A5QP	0.44	No	0																													A
TCGA-AR-A5QQ	0.32	No	1																				M
TCGA-B6-A0I1	0.6	No	2											M												M
TCGA-B6-A0I2	0.92	No	0
TCGA-B6-A0I5	0.76	No	0
TCGA-B6-A0I9	0.3	No	1																				M
TCGA-B6-A0IA		No	1																							M
TCGA-B6-A0IB	1.32	No	0
TCGA-B6-A0IC	0.82	No	0
TCGA-B6-A0IE	0.5	No	1																				M
TCGA-B6-A0IG		No	2																				M			M
TCGA-B6-A0IH	0.42	No	0
TCGA-B6-A0IJ		No	0
TCGA-B6-A0IK	0.52	No	1																							M
TCGA-B6-A0IM	1.76	No	2																				M			M																				M
TCGA-B6-A0IN	0.44	No	0																								M					A
TCGA-B6-A0IO		No	1							A
TCGA-B6-A0IP		No	1																					M
TCGA-B6-A0IQ		No	1																				M						M
TCGA-B6-A0RE	0.42	No	2							A																M
TCGA-B6-A0RG	1.5	No	2									A														M
TCGA-B6-A0RH	0.78	No	1																				M
TCGA-B6-A0RI	0.58	No	2																				M			M
TCGA-B6-A0RN	0.18	No	0
TCGA-B6-A0RO	0.4	No	1																				M
TCGA-B6-A0RP	0.46	No	1																				M
TCGA-B6-A0RQ	0.4	No	0
TCGA-B6-A0RT	0.16	No	1																				M						M
TCGA-B6-A0RU	0.22	No	0
TCGA-B6-A0RV	0.46	No	1																							M
TCGA-B6-A0WS	0.64	No	0																									M
TCGA-B6-A0WT	0.2	No	0																													A
TCGA-B6-A0WV	0.34	No	0																													A
TCGA-B6-A0WW	0.4	No	0
TCGA-B6-A0WX	0.44	No	2																				M	M
TCGA-B6-A0WY	0.16	No	1																							M
TCGA-B6-A0WZ	0.3	No	0
TCGA-B6-A0X0	0.54	No	0
TCGA-B6-A0X1	0.36	No	0
TCGA-B6-A0X4	0.84	Yes	3							A									A							M
TCGA-B6-A0X5	0.22	No	0
TCGA-B6-A0X7		No	1																				M									A
TCGA-B6-A1KC	0.48	No	1																				M
TCGA-B6-A1KF	0.62	No	0
TCGA-B6-A1KI	0.98	No	1																							M
TCGA-B6-A1KN	0.48	No	1																				M
TCGA-B6-A2IU	1	No	1																							M						A
TCGA-B6-A3ZX	0.6	No	0																										M																M
TCGA-B6-A400	0.4	No	1																							M
TCGA-B6-A401	0.32	No	2											M												M
TCGA-B6-A402	0.24	No	2																				M			M
TCGA-B6-A408	0.6	No	1																							M
TCGA-B6-A409	0.4	No	1																				M									A
TCGA-B6-A40B	0.4	No	1																							M
TCGA-B6-A40C	0.7	No	1																				M						M
TCGA-BH-A0AU	0.48	No	0																										M
TCGA-BH-A0AV	0.24	No	0
TCGA-BH-A0AW	0.88	No	0
TCGA-BH-A0AY	1.88	No	1																							M													M
TCGA-BH-A0AZ	0.58	No	0
TCGA-BH-A0B0	0.82	No	0
TCGA-BH-A0B3	0.78	No	2																				M			M
TCGA-BH-A0B4	0.1	No	2					A																		M
TCGA-BH-A0B5	1.04	No	0
TCGA-BH-A0B6	0.98	No	1																				M
TCGA-BH-A0B7	8.7	No	1																				M					M
TCGA-BH-A0B9		No	1																							M
TCGA-BH-A0BA	0.24	No	1																							M
TCGA-BH-A0BC	0.4	No	1																				M						M
TCGA-BH-A0BD	0.38	No	2																				M			M
TCGA-BH-A0BF	0.24	No	1																				M
TCGA-BH-A0BG	0.34	No	1																				M
TCGA-BH-A0BJ	0.84	No	1																							M
TCGA-BH-A0BL	0.24	No	1																				M
TCGA-BH-A0BM	0.74	No	1																							M
TCGA-BH-A0BO	0.22	No	1																				M
TCGA-BH-A0BP	0.34	No	1																				M
TCGA-BH-A0BQ	1.92	No	1																							M
TCGA-BH-A0BR		No	0
TCGA-BH-A0BS	0.3	No	1																							M
TCGA-BH-A0BT	0.28	No	0
TCGA-BH-A0BV	0.62	No	2																				M			M
TCGA-BH-A0BW	0.42	No	1																				M
TCGA-BH-A0BZ		No	2					A																		M
TCGA-BH-A0C0	1.12	No	0																													A
TCGA-BH-A0C1	1.2	No	2																						M	M
TCGA-BH-A0C3	0.5	No	1										M																M
TCGA-BH-A0C7	0.26	No	1																							M
TCGA-BH-A0DD	0.02	No	0
TCGA-BH-A0DE	0.32	No	1												M
TCGA-BH-A0DG	0.44	No	1																				M
TCGA-BH-A0DH	0.54	No	0																													A
TCGA-BH-A0DI	0.56	No	0
TCGA-BH-A0DK	0.6	No	1																							M						A
TCGA-BH-A0DL	1.28	No	1																				M
TCGA-BH-A0DO	0.88	Yes	3									A											M			M
TCGA-BH-A0DP	0.2	No	1																				M
TCGA-BH-A0DQ	0.3	No	1																				M
TCGA-BH-A0DS	0.46	No	0
TCGA-BH-A0DT	0.38	No	0
TCGA-BH-A0DV	0.18	No	1																				M
TCGA-BH-A0DX	0.14	No	1																				M
TCGA-BH-A0DZ	1.02	No	1																				M
TCGA-BH-A0E0	3.5	No	1																							M
TCGA-BH-A0E1	0.54	No	2				M																			M
TCGA-BH-A0E2	0.44	No	0
TCGA-BH-A0E6		No	0																													A
TCGA-BH-A0E7	0.42	No	1																							M						A
TCGA-BH-A0E9	0.46	No	0
TCGA-BH-A0EA	0.2	No	1																					M					M
TCGA-BH-A0EB	0.4	No	1																				M
TCGA-BH-A0EE	0.58	No	1																				M
TCGA-BH-A0EI	1.42	No	1																				M
TCGA-BH-A0GY	0.28	No	0																													A
TCGA-BH-A0GZ	0.48	No	2																				M			M						A
TCGA-BH-A0H0	0.46	No	0
TCGA-BH-A0H3	0.32	No	0
TCGA-BH-A0H5	0.18	No	1																				M
TCGA-BH-A0H6	0.14	No	0
TCGA-BH-A0H7	0.3	No	0
TCGA-BH-A0H9	0.74	No	1																							M
TCGA-BH-A0HA		No	1																				M
TCGA-BH-A0HB	0.56	No	1																				M				M														M
TCGA-BH-A0HI	0.48	No	0
TCGA-BH-A0HK	0.42	No	1																				M
TCGA-BH-A0HO	1.3	No	0
TCGA-BH-A0HP	0.58	No	0
TCGA-BH-A0HQ	3.48	No	1																					M					M
TCGA-BH-A0HU	0.42	No	2							A									A
TCGA-BH-A0HW	0.84	No	0
TCGA-BH-A0HX	0.44	No	0																													A
TCGA-BH-A0HY	0.28	No	1																							M
TCGA-BH-A0RX	0.78	No	1																							M						A
TCGA-BH-A0W3	0.34	No	1																							M
TCGA-BH-A0W4	0.28	No	1																				M
TCGA-BH-A0W5	0.5	No	0
TCGA-BH-A0W7	0.34	No	1																				M															M
TCGA-BH-A0WA	2.56	No	1																				M															M
TCGA-BH-A18F	1.4	No	1																							M
TCGA-BH-A18G	0.74	No	1																				M						M
TCGA-BH-A18H	17.02	No	1																						M		M	M
TCGA-BH-A18I	0.52	No	2																				M			M
TCGA-BH-A18J	0.34	No	1																				M
TCGA-BH-A18K	0.96	No	1																				M
TCGA-BH-A18L	0.54	No	0
TCGA-BH-A18M	0.5	No	0
TCGA-BH-A18N	0.22	No	0
TCGA-BH-A18P	0.5	No	0
TCGA-BH-A18Q	4.2	No	1										M																M
TCGA-BH-A18R	1.14	No	1																							M
TCGA-BH-A18S	0.4	No	0
TCGA-BH-A18T	0.46	No	0
TCGA-BH-A18U	1.12	No	1																							M
TCGA-BH-A18V	1.22	Yes	2									A														M						A
TCGA-BH-A1EN	2.64	No	2																	M						M
TCGA-BH-A1EO	0.82	No	0																													A																M
TCGA-BH-A1ES	0.56	No	0
TCGA-BH-A1ET	0.28	No	0																													A
TCGA-BH-A1EU		No	1																				M
TCGA-BH-A1EV	0.38	No	1																				M
TCGA-BH-A1EW	1.46	No	0
TCGA-BH-A1EX	0.14	No	0
TCGA-BH-A1EY	0.5	No	0
TCGA-BH-A1F0		No	1																							M
TCGA-BH-A1F2	0.76	No	1																							M
TCGA-BH-A1F5	1.06	No	1																							M
TCGA-BH-A1F6	0.82	No	0
TCGA-BH-A1F8	0.48	No	1																							M
TCGA-BH-A1FC	2.02	No	2																				M	M								A
TCGA-BH-A1FD	1.92	No	1																							M
TCGA-BH-A1FE	0.48	No	1																							M						A
TCGA-BH-A1FG	0.56	Yes	3										M										M			M
TCGA-BH-A1FH	0.22	No	0																													A
TCGA-BH-A1FJ	0.5	No	0																													A
TCGA-BH-A1FL	0.42	No	0
TCGA-BH-A1FM	0.3	No	0
TCGA-BH-A1FN	0.88	No	0																													A
TCGA-BH-A1FR	1.58	No	1																							M
TCGA-BH-A1FU		No	1												M
TCGA-BH-A201	0.36	No	1																							M
TCGA-BH-A202	0.28	No	0																													A
TCGA-BH-A203	0.4	No	2																				M			M
TCGA-BH-A204	0.78	No	2																				M			M
TCGA-BH-A208	0.64	No	0																													A
TCGA-BH-A209	0.78	No	2																				M			M
TCGA-BH-A28O	1.16	No	0																										M			A
TCGA-BH-A28Q	0.08	No	0
TCGA-BH-A2L8	0.26	No	0																										M
TCGA-BH-A42T	5.74	Yes	2																				M	M					M		M
TCGA-BH-A42U	0.62	No	1																				M									A
TCGA-BH-A42V	0.12	No	0
TCGA-BH-A5IZ	0.4	No	1																				M									A
TCGA-BH-A5J0	0.98	No	1																							M
TCGA-C8-A12K	0.9	No	2																				M			M
TCGA-C8-A12L	1.6	No	1																							M	M
TCGA-C8-A12M	1.12	No	2																				M			M																		M
TCGA-C8-A12N	0.78	No	0
TCGA-C8-A12O	0.24	No	1																				M
TCGA-C8-A12P	0.54	No	1																							M						A
TCGA-C8-A12Q	2.34	No	2						M																	M
TCGA-C8-A12T	1.48	No	1																							M
TCGA-C8-A12U	2.26	No	2																				M			M
TCGA-C8-A12V	0.56	No	1																				M
TCGA-C8-A12W	0.3	No	0
TCGA-C8-A12X	0.7	No	1																							M
TCGA-C8-A12Y	1.02	No	0
TCGA-C8-A12Z	0.44	No	1																				M
TCGA-C8-A130	0.72	No	1																							M
TCGA-C8-A131	0.56	No	2																				M			M
TCGA-C8-A132	0.84	Yes	3															M					M			M
TCGA-C8-A133	0.72	No	0
TCGA-C8-A134	0.34	No	1																				M
TCGA-C8-A135	1.36	No	2							A																M
TCGA-C8-A137	0.84	No	2										M													M
TCGA-C8-A138	0.7	No	0
TCGA-C8-A1HE	0.64	No	1																							M
TCGA-C8-A1HF		No	1																				M																		M
TCGA-C8-A1HG	0.54	No	2																				M			M
TCGA-C8-A1HI	0.58	No	1																							M
TCGA-C8-A1HJ	0.56	No	0
TCGA-C8-A1HK	1.58	No	1																							M
TCGA-C8-A1HL	1.04	No	1																							M						A
TCGA-C8-A1HM	0.44	No	0
TCGA-C8-A1HN	4.74	No	2													M										M
TCGA-C8-A1HO		No	0																													A
TCGA-C8-A26V	0.56	No	0																										M
TCGA-C8-A26W	1.1	No	1																							M
TCGA-C8-A26X	0.76	No	2																				M			M
TCGA-C8-A26Y	1.18	No	1																							M
TCGA-C8-A26Z	10.16	No	1																					M															M
TCGA-C8-A273	0.74	No	0																													A
TCGA-C8-A274	0.54	No	1							A
TCGA-C8-A275	3.22	No	2										M										M						M
TCGA-C8-A278	1.62	No	1																							M
TCGA-C8-A27A	0.48	No	2																				M			M
TCGA-C8-A27B	0.38	No	1																							M						A
TCGA-C8-A3M7	2.4	No	2									A														M
TCGA-C8-A3M8	1.98	No	2										M										M						M
TCGA-D8-A13Y	0.76	No	1																				M
TCGA-D8-A13Z	0.94	No	0
TCGA-D8-A140	1.26	No	2																					M		M
TCGA-D8-A141	1.18	No	0
TCGA-D8-A142	0.3	No	0
TCGA-D8-A143	0.98	No	1																							M
TCGA-D8-A145	0.64	No	2									A											M
TCGA-D8-A146	0.52	No	0
TCGA-D8-A147	0.5	No	1																				M
TCGA-D8-A1J8	2.04	No	1																							M
TCGA-D8-A1J9	10.5	Yes	3																				M	M	M																						M
TCGA-D8-A1JA	2.58	No	1																							M		M												M
TCGA-D8-A1JB	13.86	Yes	1																						M								M												M	M
TCGA-D8-A1JC	0.52	No	0
TCGA-D8-A1JD	1.18	No	0																													A
TCGA-D8-A1JE	1.78	No	1																				M
TCGA-D8-A1JF	0.6	No	1																				M
TCGA-D8-A1JG	0.76	Yes	4		A						M												M			M
TCGA-D8-A1JH	1.9	No	2																				M			M
TCGA-D8-A1JI	0.34	No	1																				M
TCGA-D8-A1JJ	0.58	No	1																					M								A
TCGA-D8-A1JK	1.08	No	2																				M			M
TCGA-D8-A1JL	2.92	Yes	2																				M			M	M
TCGA-D8-A1JM	1.42	No	1																							M
TCGA-D8-A1JN	0.72	No	1																							M																						M
TCGA-D8-A1JP	2.14	No	1																				M						M
TCGA-D8-A1JS	1.86	No	1																				M
TCGA-D8-A1JT	0.32	No	1																				M
TCGA-D8-A1JU	0.8	No	0
TCGA-D8-A1X5	0.34	No	1																				M
TCGA-D8-A1X6	0.6	No	1																							M
TCGA-D8-A1X7	0.74	No	0
TCGA-D8-A1X8	0.7	No	0
TCGA-D8-A1X9	0.42	No	0
TCGA-D8-A1XA	1.38	No	0																																						M				M
TCGA-D8-A1XB	0.26	No	1																							M
TCGA-D8-A1XC	0.46	No	0
TCGA-D8-A1XF	0.48	No	0
TCGA-D8-A1XG	0.56	No	0																													A
TCGA-D8-A1XJ		No	0
TCGA-D8-A1XK		No	1																							M
TCGA-D8-A1XL		No	0																								M				M										M
TCGA-D8-A1XM		No	2																				M			M							M
TCGA-D8-A1XO		No	2										M										M
TCGA-D8-A1XQ		Yes	1																				M						M
TCGA-D8-A1XR		Yes	3																	M		M				M
TCGA-D8-A1XS		No	0
TCGA-D8-A1XT		No	1																				M
TCGA-D8-A1XU		No	1																							M						A
TCGA-D8-A1XV		No	0
TCGA-D8-A1XW		No	0
TCGA-D8-A1XY		No	1																							M
TCGA-D8-A1XZ		No	1																				M
TCGA-D8-A1Y0		No	1																							M
TCGA-D8-A1Y1		No	0
TCGA-D8-A1Y2		No	1																				M						M
TCGA-D8-A1Y3		No	1																				M									A
TCGA-D8-A27E		No	1																							M
TCGA-D8-A27F		No	0
TCGA-D8-A27G		No	2									A														M
TCGA-D8-A27H		Yes	3				M															M	M				M		M																	M
TCGA-D8-A27I		No	0
TCGA-D8-A27K		No	0																										M
TCGA-D8-A27L		No	1																				M
TCGA-D8-A27M		No	2																				M	M
TCGA-D8-A27N		No	1																							M
TCGA-D8-A27P	0.68	No	1																							M
TCGA-D8-A27R	0.34	No	1																				M
TCGA-D8-A27T	0.44	No	0																													A
TCGA-D8-A27V	0.28	No	1																				M						M
TCGA-D8-A27W		Yes	2						M															M					M
TCGA-D8-A3Z5	1.24	No	0
TCGA-D8-A3Z6	0.1	No	0																										M
TCGA-D8-A4Z1	0.34	No	1																				M						M
TCGA-E2-A105		No	0
TCGA-E2-A107		No	1																				M									A
TCGA-E2-A108		No	0																										M
TCGA-E2-A109		No	1																							M
TCGA-E2-A10A	0.26	No	0																													A
TCGA-E2-A10B		No	0																													A
TCGA-E2-A10C	0.24	No	1																				M
TCGA-E2-A10E		No	2																	M			M					M
TCGA-E2-A10F		No	0
TCGA-E2-A14N		No	1																				M						M
TCGA-E2-A14O	5.44	No	1																							M
TCGA-E2-A14P	0.5	No	0
TCGA-E2-A14Q	1.1	No	1																							M
TCGA-E2-A14R	0.44	No	0
TCGA-E2-A14S	1.74	No	1																							M
TCGA-E2-A14T	0.48	No	0
TCGA-E2-A14U	0.4	No	0
TCGA-E2-A14V	0.08	No	1																				M
TCGA-E2-A14W	0.7	No	1																				M
TCGA-E2-A14X	1.24	No	0																														M
TCGA-E2-A14Y	0.36	No	1																							M
TCGA-E2-A14Z	0.38	No	2																				M			M
TCGA-E2-A150	0.96	No	0
TCGA-E2-A152	0.64	Yes	3						M			A														M
TCGA-E2-A153	1.82	No	2																				M			M
TCGA-E2-A154	0.36	No	1																				M
TCGA-E2-A155	0.66	No	1																				M
TCGA-E2-A156	0.8	No	1																							M
TCGA-E2-A158	0.34	No	1																				M
TCGA-E2-A159	1.34	No	2							A																M
TCGA-E2-A15A	2.18	No	1																							M
TCGA-E2-A15C	0.76	No	0																													A
TCGA-E2-A15D	0.42	No	1																				M									A
TCGA-E2-A15E	0.46	No	0
TCGA-E2-A15F		No	2																				M			M
TCGA-E2-A15G	0.56	No	0																													A
TCGA-E2-A15H	0.66	No	1																				M
TCGA-E2-A15I		No	0
TCGA-E2-A15J	0.46	No	0
TCGA-E2-A15K	0.34	No	0
TCGA-E2-A15L	0.62	No	1																				M										M
TCGA-E2-A15M	0.46	No	1																				M								M
TCGA-E2-A15O	1.38	No	1																							M
TCGA-E2-A15P	0.48	No	0
TCGA-E2-A15R	0.28	No	1																				M
TCGA-E2-A15S	0.58	No	0																													A
TCGA-E2-A15T	0.72	No	0																													A
TCGA-E2-A1AZ	0.42	No	0
TCGA-E2-A1B0	0.86	No	0
TCGA-E2-A1B1	0.48	No	1																							M
TCGA-E2-A1B4	0.22	No	0
TCGA-E2-A1B5	0.54	No	1																				M
TCGA-E2-A1B6	0.22	No	0
TCGA-E2-A1BC	0.2	No	1																							M
TCGA-E2-A1BD	0.38	No	1																				M
TCGA-E2-A1IE	0.56	No	2				M																M
TCGA-E2-A1IF	0.34	No	0																									M				A
TCGA-E2-A1IG	0.2	No	2															M					M
TCGA-E2-A1IH	0.68	No	0
TCGA-E2-A1II	1.08	Yes	1																					M					M			A
TCGA-E2-A1IJ	0.38	No	1																							M
TCGA-E2-A1IK	0.14	No	0																									M	M
TCGA-E2-A1IL	0.18	No	0
TCGA-E2-A1IN	0.3	No	1																				M
TCGA-E2-A1IO	3.08	Yes	3																		M		M			M
TCGA-E2-A1IU	0.16	No	2																				M			M
TCGA-E2-A1L6	0.26	No	0
TCGA-E2-A1L7	0.78	No	1																				M
TCGA-E2-A1L8	1.06	No	1																							M
TCGA-E2-A1L9	0.88	No	1																				M						M
TCGA-E2-A1LA	0.52	No	0
TCGA-E2-A1LB	1.42	No	0
TCGA-E2-A1LE	0.56	No	0
TCGA-E2-A1LG	0.98	No	2									A														M
TCGA-E2-A1LH	1.72	No	1																							M						A
TCGA-E2-A1LI	2.38	No	1																							M
TCGA-E2-A1LK	0.32	No	0
TCGA-E2-A1LL	0.48	No	1																							M	M					A
TCGA-E2-A2P5	0.66	No	1							A
TCGA-E2-A2P6	0.98	No	2																				M			M			M
TCGA-E2-A3DX	1.4	No	0																										M
TCGA-E2-A56Z	0.02	No	0
TCGA-E2-A570	0.62	No	0
TCGA-E2-A573	0.26	No	0																																		M
TCGA-E2-A574	0.72	No	1																							M
TCGA-E9-A1N3	1.3	No	0																												M	A
TCGA-E9-A1N4	0.36	No	0
TCGA-E9-A1N5	0.34	No	0
TCGA-E9-A1N8	0.64	No	2																				M			M
TCGA-E9-A1N9	0.48	No	1																							M
TCGA-E9-A1NA	0.62	No	2							A																M
TCGA-E9-A1NC	1.24	No	0																														M
TCGA-E9-A1ND	0.98	No	0
TCGA-E9-A1NE	1.24	No	1																							M
TCGA-E9-A1NF	0.76	No	0
TCGA-E9-A1NG	1.16	No	1																							M
TCGA-E9-A1NH	0.46	No	2															M					M
TCGA-E9-A1NI	0.48	No	1																				M
TCGA-E9-A1QZ	0.22	No	1																				M
TCGA-E9-A1R0	0.28	No	0
TCGA-E9-A1R2	0.42	No	1																				M
TCGA-E9-A1R3	0.76	No	0																													A
TCGA-E9-A1R4	0.38	No	1																				M
TCGA-E9-A1R5	1.6	No	1																				M
TCGA-E9-A1R6	0.6	No	2										M										M
TCGA-E9-A1R7	0.34	No	0
TCGA-E9-A1RA	0.68	No	0
TCGA-E9-A1RB	0.24	No	1																				M
TCGA-E9-A1RC	0.44	No	1																							M						A
TCGA-E9-A1RD		No	1																				M
TCGA-E9-A1RE	0.64	No	1																				M
TCGA-E9-A1RF	1.1	No	1																				M
TCGA-E9-A1RG	1.92	No	0
TCGA-E9-A1RH	0.58	No	0
TCGA-E9-A1RI	1.04	No	1																							M
TCGA-E9-A226	0.12	No	1																				M
TCGA-E9-A227	0.44	No	1																				M
TCGA-E9-A228	0.38	No	1																				M
TCGA-E9-A229	0.68	No	0																													A
TCGA-E9-A22A	0.2	No	1																				M
TCGA-E9-A22B	0.82	No	0																													A
TCGA-E9-A22D	0.88	No	0																													A
TCGA-E9-A22E	0.4	No	0
TCGA-E9-A22G	1.26	No	0																												M
TCGA-E9-A22H	1.26	No	2					A									A
TCGA-E9-A243	0.36	No	0
TCGA-E9-A244	0.78	No	1																							M
TCGA-E9-A245	1.4	No	2									A														M
TCGA-E9-A247	0.22	No	0
TCGA-E9-A248	0.78	No	1							A
TCGA-E9-A249	0.4	No	1																							M
TCGA-E9-A24A	0.26	No	1																				M
TCGA-E9-A295	0.34	No	0
TCGA-E9-A2JS	1.58	No	1																				M
TCGA-E9-A2JT	0.8	No	0																													A
TCGA-E9-A3HO	0.1	No	0																										M			A
TCGA-E9-A3Q9	0.76	No	0
TCGA-E9-A3QA	0.4	No	0
TCGA-E9-A3X8	0.52	No	0																													A
TCGA-E9-A54X	0.26	No	0																										M
TCGA-E9-A54Y	0.44	No	0
TCGA-E9-A5FK	0.42	No	0																													A
TCGA-E9-A5FL	0.28	No	0
TCGA-E9-A5UO	1.3	No	1																							M																M
TCGA-E9-A5UP	0.26	No	1																	M
TCGA-EW-A1IW	0.36	No	0																								M
TCGA-EW-A1IX	1.52	No	1																				M
TCGA-EW-A1IY		No	1																				M									A
TCGA-EW-A1IZ	0.3	No	0
TCGA-EW-A1J1	3.72	No	1																				M															M
TCGA-EW-A1J2	0.24	No	1																				M
TCGA-EW-A1J3	0.82	No	1																				M						M
TCGA-EW-A1J5	0.9	No	0
TCGA-EW-A1J6	5.7	No	1																				M						M
TCGA-EW-A1OV	0.54	No	0																									M
TCGA-EW-A1OX	1.3	No	2																				M	M
TCGA-EW-A1OY	0.28	No	0
TCGA-EW-A1OZ	0.82	No	1																							M
TCGA-EW-A1P0	0.78	No	1																							M
TCGA-EW-A1P1	0.28	No	1																				M
TCGA-EW-A1P3	0.22	No	0
TCGA-EW-A1P4	0.18	No	0
TCGA-EW-A1P5	0.96	No	2		A																					M														M
TCGA-EW-A1P6	0.24	No	1																				M
TCGA-EW-A1P7	0.36	No	0
TCGA-EW-A1P8	0.3	No	0
TCGA-EW-A1PA	0.5	No	1														A										M					A
TCGA-EW-A1PB	0.5	Yes	1																							M						A
TCGA-EW-A1PC	1.94	No	1							A
TCGA-EW-A1PD	1.4	No	2																				M			M
TCGA-EW-A1PE	1.18	No	1										M
TCGA-EW-A1PG	0.34	No	1																				M								M
TCGA-EW-A1PH	0.08	No	0
TCGA-EW-A2FR	0.76	No	1																							M
TCGA-EW-A2FS	0.48	No	1																							M						A
TCGA-EW-A2FV	0.26	No	0
TCGA-EW-A2FW	0.2	No	1																				M
TCGA-EW-A3E8	0.28	No	0
TCGA-EW-A3U0	0.94	No	1																				M						M
TCGA-EW-A423	1.32	No	1																							M
TCGA-GI-A2C8	0.76	No	0
TCGA-GI-A2C9	1.58	No	0																										M				M
TCGA-GM-A2D9	1.62	No	2				M																			M
TCGA-GM-A2DA	5.84	No	1																				M														M
TCGA-GM-A2DB	0.4	No	0
TCGA-GM-A2DC	1.5	No	2																					M		M
TCGA-GM-A2DD	0.36	No	0
TCGA-GM-A2DF	0.66	Yes	3					A															M			M			M
TCGA-GM-A2DH	0.44	No	1																							M						A
TCGA-GM-A2DI	1.9	No	2																				M			M
TCGA-GM-A2DK	0.4	No	2																				M			M
TCGA-GM-A2DL	0.34	No	0
TCGA-GM-A2DM	0.62	No	1																							M
TCGA-GM-A2DN	0.36	No	0																								M
TCGA-GM-A2DO		No	0
TCGA-GM-A3NW	0.22	No	0																										M			A
TCGA-GM-A3NY	0.72	No	2			M																	M									A
TCGA-GM-A3XG	0.64	No	2												M								M
TCGA-GM-A3XL	0.02	No	0
TCGA-GM-A3XN	1.32	No	1																							M					M
TCGA-GM-A4E0	0.18	No	1																				M						M
TCGA-GM-A5PV	0.28	No	1																					M					M
TCGA-GM-A5PX	0.36	No	1																					M					M
TCGA-HN-A2NL	0.34	No	0																										M
TCGA-HN-A2OB	1.24	No	0
TCGA-JL-A3YW	0.18	No	1																				M									A
TCGA-JL-A3YX	1.16	No	1																							M
TCGA-LL-A440	0.3	No	1																				M
TCGA-LL-A441	0.16	No	0																													A
TCGA-LL-A50Y	0.46	No	0
TCGA-LL-A5YL	0.34	No	1																				M						M
TCGA-LL-A5YM	0.9	No	0
TCGA-LL-A5YN	0.3	No	0
TCGA-LL-A5YO	0.32	No	1																				M					M
TCGA-LL-A5YP	0.34	No	1																							M
TCGA-LQ-A4E4	0.92	Yes	2																					M		M													M
TCGA-MS-A51U	1.14	No	1																				M						M
TCGA-OK-A5Q2	0.22	No	1																				M						M
TCGA-OL-A5D6	0.22	No	1																				M
TCGA-OL-A5D7	0.56	Yes	3										M										M			M
TCGA-OL-A5D8	0.9	No	1																							M
TCGA-OL-A5DA	0.32	No	0
TCGA-OL-A5RU	0.8	No	1																				M						M
TCGA-OL-A5RV	0.52	No	0
TCGA-OL-A5RW	0.14	No	0																										M
TCGA-OL-A5RX	2.34	Yes	3									A							A							M		M
TCGA-OL-A5RY	0.38	No	1																				M
TCGA-OL-A5RZ	0.08	No	1																							M
TCGA-OL-A5S0	1.48	No	0
TCGA-OL-A66H	0.4	No	1																				M
TCGA-OL-A66I	0.32	No	0
TCGA-OL-A66J	0.4	No	1																							M						A
TCGA-OL-A66K	0.82	No	0																													A
TCGA-PE-A5DC	0.32	No	0																										M
TCGA-PE-A5DD	1.44	No	0
TCGA-PE-A5DE	0.78	No	1																				M						M
	0.54
	3.86607
[truncated: 10 more columns]
